# Supplementary material for: Electrochemical manipulation of cell populations supported by biodegradable polymeric nanosheets for cell transplantation therapy
Source: Royal Society of Chemistry journal article supplement (doi:10.1039/c6bm00852f), 2017-01-01
Supplement: c6bm00852f4.pdf [file c6bm00852f4.pdf]

## **Electrochemical Manipulation of Cell Populations Supported by Biodegradable Polymeric Nanosheets for Cell Transplantation Therapy**

Jin Suzuki<sup>1</sup>, Nobuhiro Nagai<sup>2</sup>, Matsuhiko Nishizawa<sup>1</sup>, Toshiaki Abe<sup>2</sup>, Hirokazu Kaji<sup>1,\*</sup>

<sup>1</sup>Department of Finemechanics, Graduate School of Engineering, Tohoku University,  
6-6-01 Aramaki, Aoba-ku, Sendai 980-8579, Japan

<sup>2</sup>Division of Clinical Cell Therapy, United Centers for Advanced Research and  
Translational Medicine (ART), Tohoku University Graduate School of Medicine, 2-1  
Seiryō, Aoba-ku, Sendai 980-8575, Japan

\*Corresponding author: Hirokazu Kaji ([kaji@biomems.mech.tohoku.ac.jp](mailto:kaji@biomems.mech.tohoku.ac.jp))

Tel/Fax: +81-22-795-4249

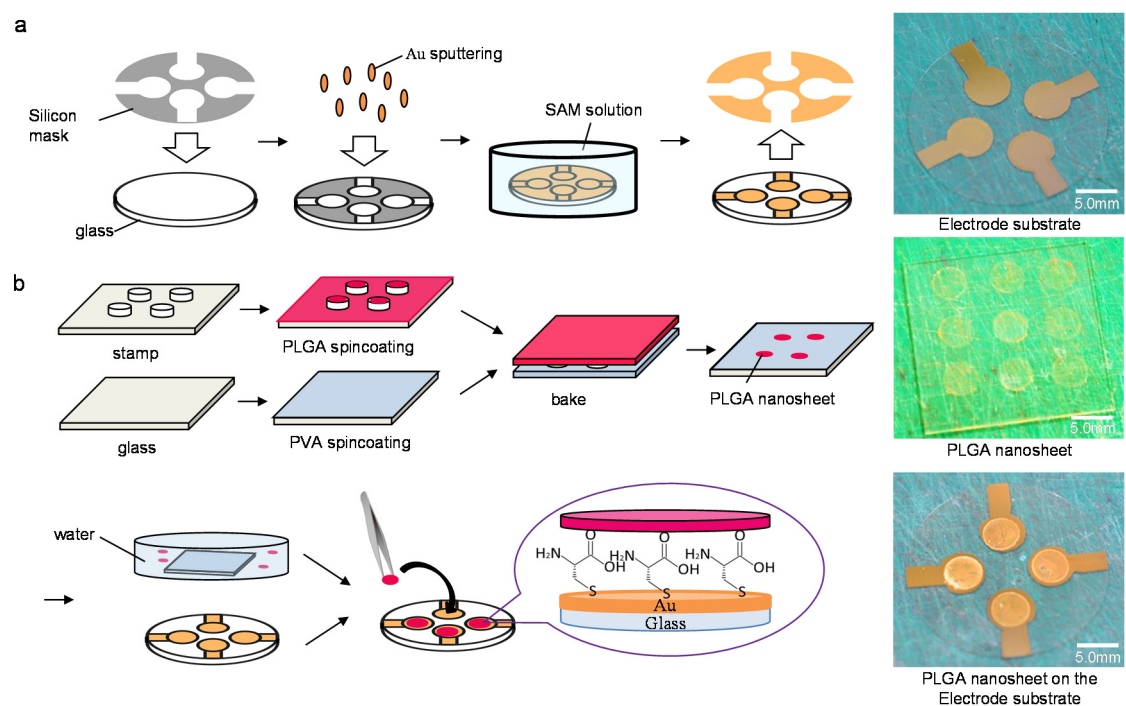

**Figure S1.** Schematic diagram showing the process of (a) preparation and modification of electrode substrates with SAMs and (b) preparation of nanosheets.

**Movie S1.** A nanosheet detaching from the non-porous electrode along under reductive desorption of the SAM.

**Movie S2.** A cell/nanosheet construct detaching from the non-porous electrode under reductive desorption of the SAM.

**Movie S3.** A nanosheet detaching from the porous electrode along under reductive desorption of the SAM.
